# Supplementary material
Source: PubMed Central journal article supplement (PMC6485389)
Supplement: NIHMS77892-supplement-Reporting_summary.pdf [file NIHMS77892-supplement-Reporting_summary.pdf]

## Reporting Summary

Nature Research wishes to improve the reproducibility of the work that we publish. This form provides structure for consistency and transparency in reporting. For further information on Nature Research policies, see [Authors & Referees](#) and the [Editorial Policy Checklist](#).

### Statistical parameters

When statistical analyses are reported, confirm that the following items are present in the relevant location (e.g. figure legend, table legend, main text, or Methods section).

n/a | Confirmed

- The exact sample size ( $n$ ) for each experimental group/condition, given as a discrete number and unit of measurement
- An indication of whether measurements were taken from distinct samples or whether the same sample was measured repeatedly
- The statistical test(s) used AND whether they are one- or two-sided  
*Only common tests should be described solely by name; describe more complex techniques in the Methods section.*
- A description of all covariates tested
- A description of any assumptions or corrections, such as tests of normality and adjustment for multiple comparisons
- A full description of the statistics including central tendency (e.g. means) or other basic estimates (e.g. regression coefficient) AND variation (e.g. standard deviation) or associated estimates of uncertainty (e.g. confidence intervals)
- For null hypothesis testing, the test statistic (e.g.  $F$ ,  $t$ ,  $r$ ) with confidence intervals, effect sizes, degrees of freedom and  $P$  value noted  
*Give  $P$  values as exact values whenever suitable.*
- For Bayesian analysis, information on the choice of priors and Markov chain Monte Carlo settings
- For hierarchical and complex designs, identification of the appropriate level for tests and full reporting of outcomes
- Estimates of effect sizes (e.g. Cohen's  $d$ , Pearson's  $r$ ), indicating how they were calculated
- Clearly defined error bars  
*State explicitly what error bars represent (e.g.  $SD$ ,  $SE$ ,  $CI$ )*

*Our web collection on [statistics for biologists](#) may be useful.*

### Software and code

Policy information about [availability of computer code](#)

#### Data collection

Fluorescent images were collected using SoftWorx 6.0 software (Applied Precision/GE Healthcare) and Nikon Imaging Software (NIS-Elements AR 5.51.00). Western blot signals were detected using an ImageQuant LAS 4000 (GE Healthcare) imager and its control software. Electron microscopy images were collected using Tecnai Imaging & Analysis 4.7 (Thermo Scientific, Eindhoven). Mass-spectrometry data was collected using Thermo Scientific Xcalibur processing and its instrument control software. SEC data was collected using the UNICORN software (GE healthcare). Single molecule EM images were collected using JEOL-1230 and its instrument control software. SEC-MALLS: Scattering data collected using miniDAWN Tristar detector (Wyatt Technologies) and ASTRA V 5.3.2.17. SPR: Biacore T200 (GE Healthcare) and Biacore T200 Control Software Version: 2.0.1. SAXS: Synchrotron X-ray data collected on Pilatus 1M detector and BsxCuBE (doi:10.1107/S0909049513010431).

#### Data analysis

Prism 6 and 7 and Microsoft Excel 2017 were used for statistical analysis and graphical data presentation (<https://www.graphpad.com/>). Image J v1.50e (<https://imagej.nih.gov/ij/>) and Fiji v2.0.0-rc-43/1.51h (<https://fiji.sc/>) were used to analyze image data. Proteome Discoverer™ Software v2.2 (ThermoFisher Scientific) was used to analyze MS data. CRYO-EM image processing was performed using the Scipion platform (<http://scipion.cnb.csic.es>). SAXS data analysis was performed using ScÅtter (<http://www.bioisis.net/tutorial>). The SEC-MALLS data were analysed by ASTRA (Wyatt Technologies) software. Conserved Feature Extraction was performed with IUpred, MARCOIL, MEME algorithm, MAFFT-LINSI, HMMER package.

For manuscripts utilizing custom algorithms or software that are central to the research but not yet described in published literature, software must be made available to editors/reviewers upon request. We strongly encourage code deposition in a community repository (e.g. GitHub). See the Nature Research [guidelines for submitting code & software](#) for further information.

## Data

Policy information about [availability of data](#)

All manuscripts must include a [data availability statement](#). This statement should provide the following information, where applicable:

- Accession codes, unique identifiers, or web links for publicly available datasets
- A list of figures that have associated raw data
- A description of any restrictions on data availability

The datasets generated during the current study are available from the corresponding author on reasonable request.

## Field-specific reporting

Please select the best fit for your research. If you are not sure, read the appropriate sections before making your selection.

Life sciences  Behavioural & social sciences

For a reference copy of the document with all sections, see [nature.com/authors/policies/ReportingSummary-flat.pdf](https://www.nature.com/authors/policies/ReportingSummary-flat.pdf)

## Life sciences

### Study design

All studies must disclose on these points even when the disclosure is negative.

|                 |                                                                                                                                                                                                                                                                                                                                                                                  |
|-----------------|----------------------------------------------------------------------------------------------------------------------------------------------------------------------------------------------------------------------------------------------------------------------------------------------------------------------------------------------------------------------------------|
| Sample size     | No statistical method was used to predetermine the sample size. Sample size was chosen based on previous experience and standards in the field. Sample size and number of independent experiments are stated in the figure legend or in the Methods section. Three to more independent results were used to perform statistical analyses. If less, no statistics were performed. |
| Data exclusions | No data is excluded if the experiments were successfully performed.                                                                                                                                                                                                                                                                                                              |
| Replication     | All experiments were reliably reproduced.                                                                                                                                                                                                                                                                                                                                        |
| Randomization   | Electron microscopy pictures of cells were randomized                                                                                                                                                                                                                                                                                                                            |
| Blinding        | Electron microscopy pictures of cells were blinded and independently analyzed by two investigators.                                                                                                                                                                                                                                                                              |

### Materials & experimental systems

Policy information about [availability of materials](#)

| n/a                                 | Involvement in the study                                  |
|-------------------------------------|-----------------------------------------------------------|
| <input type="checkbox"/>            | <input checked="" type="checkbox"/> Unique materials      |
| <input type="checkbox"/>            | <input checked="" type="checkbox"/> Antibodies            |
| <input type="checkbox"/>            | <input checked="" type="checkbox"/> Eukaryotic cell lines |
| <input checked="" type="checkbox"/> | <input type="checkbox"/> Research animals                 |
| <input checked="" type="checkbox"/> | <input type="checkbox"/> Human research participants      |

#### Unique materials

Obtaining unique materials Cpd-5 was obtained from Rene Medema lab (DOI:10.1038/onc.2015.319). Relevant plasmids used in this study are available upon reasonable request.

#### Antibodies

Antibodies used Information of antibodies, RRIDs, including species and dilution ratio are described in Supplementary Table 2

Validation Validations are based on the datasheets from the manufacturers (RRIDs of the antibodies are provided). We additionally validated the following antibodies by the use of siRNA- treated samples as negative control: ZW10, p150Glued, HEC1, KNL1, BUB1, CENP-F, MAD1, CENP-E, ROD, Spindly, Zwilch.

## Eukaryotic cell lines

Policy information about [cell lines](#)

Cell line source(s)

HeLa Flp-in cells provided by the S. Taylor lab, University of Manchester, England, UK. The Tnao38 cells come from (Hashimoto et al, 2012. BMC Biotechnol. 12:12. doi:10.1186/1472-6750-12-12)

Authentication

Cell lines were not authenticated by ourselves.

Mycoplasma contamination

Cell lines were tested multiple times over the study for eliminating possible mycoplasma contamination

Commonly misidentified lines  
(See [ICLAC](#) register)

No commonly misidentified cell line was used

## Method-specific reporting

| n/a                                 | Involvement in the study                            |
|-------------------------------------|-----------------------------------------------------|
| <input checked="" type="checkbox"/> | <input type="checkbox"/> ChIP-seq                   |
| <input checked="" type="checkbox"/> | <input type="checkbox"/> Flow cytometry             |
| <input checked="" type="checkbox"/> | <input type="checkbox"/> Magnetic resonance imaging |
